# Supplementary material for: Outcomes of an integrated care pathway for concurrent major depressive and alcohol use disorders: a multisite prospective cohort study
Source: Springer Nature journal article supplement (doi:10.1186/s12888-018-1770-3), 2018-06-13
Supplement: MOESM1 [file 15843128]

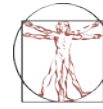

# The DA VINCI Pharmacotherapy Algorithm

| Antidepressant Trials:                                                                                    |                |        |                      |   |   |   |   |                      |   |   |   |    |                      |    |    |    |    |                                                                               |        |        |        |          |            |    |       |
|-----------------------------------------------------------------------------------------------------------|----------------|--------|----------------------|---|---|---|---|----------------------|---|---|---|----|----------------------|----|----|----|----|-------------------------------------------------------------------------------|--------|--------|--------|----------|------------|----|-------|
| Trial A - Sertraline (Fluoxetine, Venlafaxine XR, Mirtazapine -if Sertraline previously tried and failed) |                |        |                      |   |   |   |   |                      |   |   |   |    |                      |    |    |    |    |                                                                               |        |        |        |          |            |    |       |
| Trial B - Untried drug from Trial A Group                                                                 |                |        |                      |   |   |   |   |                      |   |   |   |    |                      |    |    |    |    |                                                                               |        |        |        |          |            |    |       |
| Trial C - Untried drug from Trials A and B Groups                                                         |                |        |                      |   |   |   |   |                      |   |   |   |    |                      |    |    |    |    |                                                                               |        |        |        |          |            |    |       |
| Type                                                                                                      | Medication     | Dose   | Week 1 of medication |   |   |   |   | Week 2 of medication |   |   |   |    | Week 3 of medication |    |    |    |    | Week 4                                                                        | Week 5 | Week 6 | Week 7 | Week 8 → | Max Dose   |    |       |
|                                                                                                           |                |        | Day 1                | 2 | 3 | 4 | 5 | 6                    | 7 | 8 | 9 | 10 | 11                   | 12 | 13 | 14 | 15 | 16                                                                            | 17     | 18     | 19     | 20       |            | 21 | 22-28 |
| Antidepressants                                                                                           | Sertraline     | mg AM  | 25                   |   |   |   |   | 50                   |   |   |   |    |                      |    |    |    |    | Increase dose by 50 mg every 2-4 weeks depending on tolerability and response |        |        |        |          | 200 mg/day |    |       |
|                                                                                                           | Fluoxetine     | mg AM  | 10                   |   |   |   |   |                      |   |   |   |    | 20                   |    |    |    |    | Increase dose by 20 mg every 4 weeks depending on tolerability and response   |        |        |        |          | 80 mg/day  |    |       |
|                                                                                                           | Venlafaxine XR | mg AM  | 37.5                 |   |   |   |   |                      |   |   |   |    | 75                   |    |    |    |    | Increase dose by 75 mg every 2-4 weeks depending on tolerability and response |        |        |        |          | 375 mg/day |    |       |
|                                                                                                           | Mirtazapine    | mg QHS | 15                   |   |   |   |   |                      |   |   |   |    | 30                   |    |    |    |    | Increase dose by 15 mg every 2-4 weeks depending on tolerability and response |        |        |        |          | 60 mg/day  |    |       |

| Tactics and Critical Decision Point and Critical Status Plan for the Treatment of Major Depressive Disorder                                                       |                                                                                                                                                                                                |                                                                                                                                     |                                                                                                                                     |                                                                                                             |                                                                                                                                       |
|-------------------------------------------------------------------------------------------------------------------------------------------------------------------|------------------------------------------------------------------------------------------------------------------------------------------------------------------------------------------------|-------------------------------------------------------------------------------------------------------------------------------------|-------------------------------------------------------------------------------------------------------------------------------------|-------------------------------------------------------------------------------------------------------------|---------------------------------------------------------------------------------------------------------------------------------------|
| STARTING POINT → Week 0 (CDP#1) QIDs ≥ 9 Symptomatic PLAN → Initiate antidepressant medication; adjust dose to lower end of therapeutic dose rang or serum level. |                                                                                                                                                                                                |                                                                                                                                     |                                                                                                                                     |                                                                                                             |                                                                                                                                       |
| QIDS-C16 SCORE                                                                                                                                                    | Week 2 of medication                                                                                                                                                                           | Week 4 of medication                                                                                                                | Week 6 of med.                                                                                                                      | Week 9 of med.                                                                                              | Week 12 of med.                                                                                                                       |
| QIDS ≤ 5 (Remission)                                                                                                                                              | Continue current dose.                                                                                                                                                                         |                                                                                                                                     |                                                                                                                                     |                                                                                                             | Go to follow-up phase.                                                                                                                |
| QIDS = 6-8 (Partial Response)                                                                                                                                     | Gradually increase dose as tolerated.                                                                                                                                                          | <ul style="list-style-type: none"> <li>Continue current dose.</li> <li>Consider increasing dose.</li> </ul>                         | Increase/maximize dose.                                                                                                             | <ul style="list-style-type: none"> <li>Increase dose.</li> <li>Switch to another antidepressant.</li> </ul> | <ul style="list-style-type: none"> <li>Switch to another antidepressant.</li> <li>Increase dose and reevaluate in 2 weeks.</li> </ul> |
| QIDS = 6-8 (SEs intolerable)                                                                                                                                      | <ul style="list-style-type: none"> <li>Continue current dose and address SEs.</li> <li>Decrease dose and continue for 2 additional weeks.</li> <li>Switch to another antidepressant</li> </ul> | <ul style="list-style-type: none"> <li>Continue current dose and address SEs.</li> <li>Switch to another antidepressant.</li> </ul> | <ul style="list-style-type: none"> <li>Continue current dose and address SEs.</li> <li>Switch to another antidepressant.</li> </ul> |                                                                                                             |                                                                                                                                       |
| QIDS ≥ 9 (Non-response)                                                                                                                                           | Gradually increase dose as tolerated.                                                                                                                                                          | <ul style="list-style-type: none"> <li>Increase dose.</li> <li>Switch to another antidepressant.</li> </ul>                         |                                                                                                                                     |                                                                                                             |                                                                                                                                       |
| QIDS ≥ 9 (SEs intolerable)                                                                                                                                        | <ul style="list-style-type: none"> <li>Decrease dose and continue for 2 additional weeks.</li> <li>Switch to another antidepressant.</li> </ul>                                                | <ul style="list-style-type: none"> <li>Switch to another antidepressant.</li> </ul>                                                 | Switch to another antidepressant.                                                                                                   | Switch to another antidepressant.                                                                           | Switch to another antidepressant.                                                                                                     |

| Type                                                                                                                                                                                                                   | Medication           | Dose   | Week 1 of medication |     |   |   |    | Week 2 of medication |   |   |   |                                                                                                                                       | Week 3 of medication |    |    |    |     | Week 4 | Week 5 | Week 6 | Week 7 | Week 8 → | Max Dose   |    |       |
|------------------------------------------------------------------------------------------------------------------------------------------------------------------------------------------------------------------------|----------------------|--------|----------------------|-----|---|---|----|----------------------|---|---|---|---------------------------------------------------------------------------------------------------------------------------------------|----------------------|----|----|----|-----|--------|--------|--------|--------|----------|------------|----|-------|
|                                                                                                                                                                                                                        |                      |        | Day 1                | 2   | 3 | 4 | 5  | 6                    | 7 | 8 | 9 | 10                                                                                                                                    | 11                   | 12 | 13 | 14 | 15  | 16     | 17     | 18     | 19     | 20       |            | 21 | 22-28 |
| Anticraving                                                                                                                                                                                                            | Trial 1: Naltrexone  | mg/day | 25                   |     |   |   |    | 50                   |   |   |   |                                                                                                                                       |                      |    |    |    |     |        |        |        |        |          | 50 mg/day  |    |       |
|                                                                                                                                                                                                                        | Trial 2: Acamprosate | mg TID | 333                  | 333 |   |   |    | 666                  |   |   |   |                                                                                                                                       |                      |    |    |    |     |        |        |        |        |          | 666 mg TID |    |       |
|                                                                                                                                                                                                                        | Trial 3: Topiramate  | mg AM  |                      |     |   |   |    |                      |   |   |   |                                                                                                                                       | 25                   |    |    |    |     | 50     | 50     | 100    | 100    | 150      | 300 mg/day |    |       |
|                                                                                                                                                                                                                        | mg PM                | 25     |                      |     |   |   | 50 |                      |   |   |   |                                                                                                                                       |                      |    |    |    | 100 | 100    | 150    | 150    |        |          |            |    |       |
| Criteria for Anti-Craving Medication Treatment Non-Responders                                                                                                                                                          |                      |        |                      |     |   |   |    |                      |   |   |   | Criteria for Anti-Craving Medication Switch                                                                                           |                      |    |    |    |     |        |        |        |        |          |            |    |       |
| Treatment non-Responder will have more than 7 (women) or 14 (men) drinks per week on average.<br>OR<br>More than 1 day on which more than 3 drinks (women) or 4 drinks (men) were consumed over the period of 2 weeks. |                      |        |                      |     |   |   |    |                      |   |   |   | Being defined as a Treatment non-Responder at 3 consecutive visits will trigger a switch of anticraving medication to the next level. |                      |    |    |    |     |        |        |        |        |          |            |    |       |
